# Supplementary material for: Urea-assisted enhanced electrocatalytic activity of MoS2–Ni3S2 for overall water splitting
Source: Royal Society of Chemistry journal article supplement (doi:10.1039/d0qi00634c), 2020-01-01
Supplement: d0qi00634c1.pdf [file d0qi00634c1.pdf]

**-Electronic Supplementary Information-**

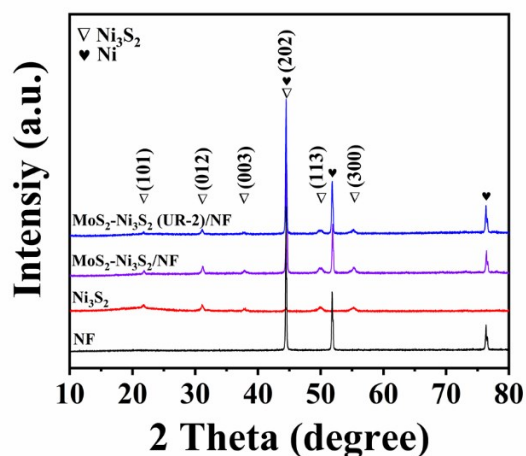

**Figure S1.** XRD patterns of NF, Ni<sub>3</sub>S<sub>2</sub>, MoS<sub>2</sub>-Ni<sub>3</sub>S<sub>2</sub>/NF, MoS<sub>2</sub>-Ni<sub>3</sub>S<sub>2</sub>(UR-2)/NF.

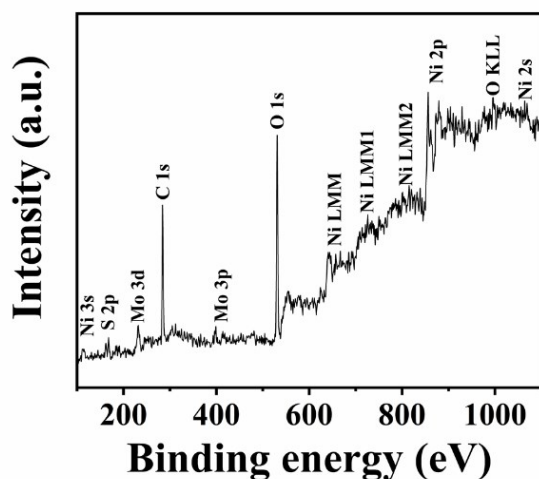

**Figure S2.** XPS survey spectra of MoS<sub>2</sub>-Ni<sub>3</sub>S<sub>2</sub>(UR-2)/NF.

**Table S1.** Comparison of HER activity of the MoS<sub>2</sub>-Ni<sub>3</sub>S<sub>2</sub>(UR-2)/NF with that of some recently reported non-precious electrocatalysts in alkaline media.

| Catalysts                                                  | $\eta_{10}$ (mV) | $\eta_{100}$ (mV) | Tafel Slope<br>(mV dec <sup>-1</sup> ) | Electrolyte | Ref.      |
|------------------------------------------------------------|------------------|-------------------|----------------------------------------|-------------|-----------|
| MoS <sub>2</sub> -Ni <sub>3</sub> S <sub>2</sub> (UR-2)/NF | 98               | 191               | 74.8                                   | 1.0 M KOH   | This work |
| Ni <sub>3</sub> S <sub>2</sub> particles                   | 335              | --                | 97                                     | 1.0 M KOH   | 1         |
| Laser-treated MoS <sub>2</sub>                             | 271              | --                | 74.5                                   | 1.0 M KOH   | 2         |

|                                                                       |       |      |        |           |    |
|-----------------------------------------------------------------------|-------|------|--------|-----------|----|
| Co-Ni <sub>3</sub> S <sub>2</sub> /NF                                 | 240   | ~370 | 144.99 | 1.0 M KOH | 3  |
| Ni <sub>3</sub> S <sub>2</sub> /Ni foam                               | 123   | 260  | 110    | 1.0 M KOH | 4  |
| MoS <sub>2</sub> /Ni <sub>3</sub> S <sub>2</sub><br>heterostructures  | 110   | --   | 83     | 1.0 M KOH | 5  |
| NiSe <sub>2</sub> nanosheets                                          | 184   | --   | 184    | 1.0 M KOH | 6  |
| V-Ni <sub>3</sub> S <sub>2</sub> -NW                                  | 68    | 350  | 112    | 1.0 M KOH | 7  |
| N dope Ni <sub>3</sub> S <sub>2</sub>                                 | 155   | ~305 | 113    | 1.0 M KOH | 8  |
| Ni <sub>3</sub> S <sub>2</sub> NWs                                    | 199.2 | --   | 106.1  | 1.0 M KOH | 9  |
| Co <sub>9</sub> S <sub>8</sub> Ni <sub>3</sub> S <sub>2</sub> HNTs/Ni | 85    | ~235 | 83.1   | 1.0 M KOH | 10 |
| Ni <sub>3</sub> S <sub>2</sub> @MoS <sub>x</sub> /NiO                 | 118   | ~256 | 65     | 1.0 M KOH | 11 |
| Ni-Fe/nanocarbon                                                      | 219   | --   | 110    | 1.0 M KOH | 12 |
| Co/ $\beta$ -Mo <sub>2</sub> C@N-CNTs                                 | 170   | --   | 92     | 1.0 M KOH | 13 |
| O-CoMoS nanosheet                                                     | 97    | 206  | 70     | 1.0 M KOH | 14 |
| G-Mo-Ni <sub>3</sub> S <sub>2</sub> -2/NF                             | 68    | ~220 | 68     | 1.0 M KOH | 15 |

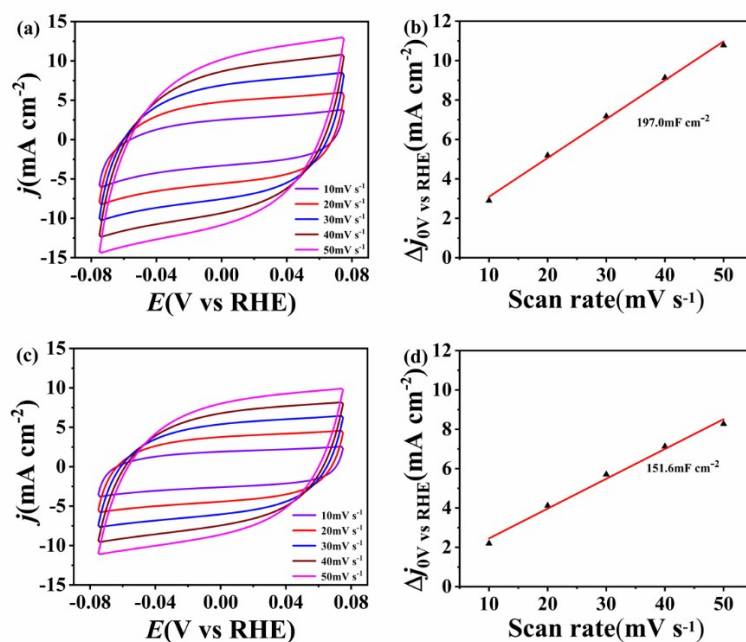

**Figure S3.** Cyclic voltammograms of (a) MoS<sub>2</sub>-Ni<sub>3</sub>S<sub>2</sub> (UR-2)/NF and (c) MoS<sub>2</sub>-Ni<sub>3</sub>S<sub>2</sub>/NF. Estimation of C<sub>dl</sub> value (b) MoS<sub>2</sub>-Ni<sub>3</sub>S<sub>2</sub> (UR-2)/NF and (d) MoS<sub>2</sub>-Ni<sub>3</sub>S<sub>2</sub>/NF.

The  $C_{dl}$  values of all catalysts can be calculated by the half of the slope of the capacitive current versus scan rate, which is by plotting the current density variation ( $\Delta j = (j_a - j_c)/2$ ) at 0 mV vs RHE ( $j_a$  and  $j_c$  represent current density of anode and cathode, respectively.). Data obtained from the cyclic voltammogram in Figure S4 (a) and (c)).

**Table S2.** Calculated double layer capacitance ( $C_{dl}$ ) and electrochemical active surface area (ECSA)

| Catalysts                                                  | $C_{dl}$ (mF cm <sup>-2</sup> ) | ECSA (cm <sup>2</sup> ) |
|------------------------------------------------------------|---------------------------------|-------------------------|
| MoS <sub>2</sub> -Ni <sub>3</sub> S <sub>2</sub> /NF       | 151.6                           | 3790                    |
| MoS <sub>2</sub> -Ni <sub>3</sub> S <sub>2</sub> (UR-2)/NF | 197.0                           | 4925                    |

Generally, the higher the double-layer capacitance ( $C_{dl}$ ) value, the more active sites on the surface of the electrocatalyst. The  $C_{dl}$  value is directly proportional to the electrochemical active surface area (ECSA), which can provide a relative comparison for average active sites on the area of the surface of the electrocatalyst. The calculation equation is as follows:

$$ECSA = C_{dl} / 40 \mu F$$

The  $C_{dl}$  value is obtained through Figure S4 b and d. The capacitance of atomically smooth planar surface in 1.0 M KOH electrolyte ranges from 20 to 60  $\mu F cm^{-2}$ . For calculation, the area normalized specific capacitance was taken to be 40  $\mu F cm^{-2}$ .

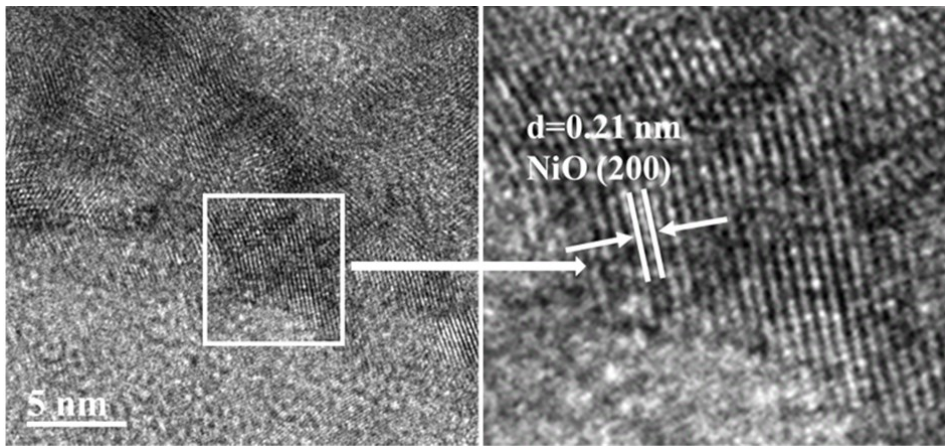

**Figure S4.** HR-TEM images of MoS<sub>2</sub>-Ni<sub>3</sub>S<sub>2</sub> (UR-2)/NF after OER test.

**Table S3.** Comparison of OER activity of the MoS<sub>2</sub>-Ni<sub>3</sub>S<sub>2</sub> (UR-2)/NF with that of some recently reported non-precious electrocatalysts in alkaline media.

| Catalysts                                                  | $\eta_{100}$ (mV) | Tafel Slope<br>(mV dec <sup>-1</sup> ) | Electrolyte | Ref.      |
|------------------------------------------------------------|-------------------|----------------------------------------|-------------|-----------|
| MoS <sub>2</sub> -Ni <sub>3</sub> S <sub>2</sub> (UR-2)/NF | 355               | 97.4                                   | 1.0 M KOH   | This work |
| G-Mo-Ni <sub>3</sub> S <sub>2</sub> -2/NF                  | ~415              | 69                                     | 1.0 M KOH   | 15        |
| Mo-Ni-Se@NF                                                | 397               | 44.9                                   | 1.0 M KOH   | 16        |
| Co-MoS <sub>1+x</sub> Se <sub>1+y</sub> 1-5                | ~450              | 71                                     | 1.0 M KOH   | 17        |
| Zn-CoNiP/NF                                                | ~380              | 51                                     | 1.0 M KOH   | 18        |
| NiCoP NWAs/NF                                              | 370               | 116                                    | 1.0 M KOH   | 19        |
| CoS <sub>x</sub> /Ni <sub>3</sub> S <sub>2</sub> @NF       | ~365              | 133                                    | 1.0 M KOH   | 20        |
| Ni/Mo <sub>2</sub> C(1:2)-NCNFs                            | 432               | 78.4                                   | 1.0 M KOH   | 21        |
| FCC-Ni-NiS/NS-rGO                                          | ~365              | 112                                    | 1.0 M KOH   | 22        |
| Ni <sub>60</sub> Fe <sub>40</sub> -S/NSC                   | 385               | 30.9                                   | 1.0 M KOH   | 23        |
| Ni-S-P                                                     | ~358              | 82                                     | 1.0 M KOH   | 24        |
| NiS <sub>2</sub> /NiSe <sub>2</sub>                        | ~400              | 119                                    | 1.0 M KOH   | 25        |
| Ni-BDC@NiS                                                 | ~430              | 62                                     | 1.0 M KOH   | 26        |
| S-CoO/Co <sub>3</sub> O <sub>4</sub>                       | ~360              | 92                                     | 1.0 M KOH   | 27        |
| NiCo <sub>2</sub> Se <sub>4</sub>                          | 420               | 63                                     | 1.0 M KOH   | 28        |
| NiFe-NiFe <sub>2</sub> O <sub>4</sub>                      | ~400              | 74                                     | 1.0 M KOH   | 29        |

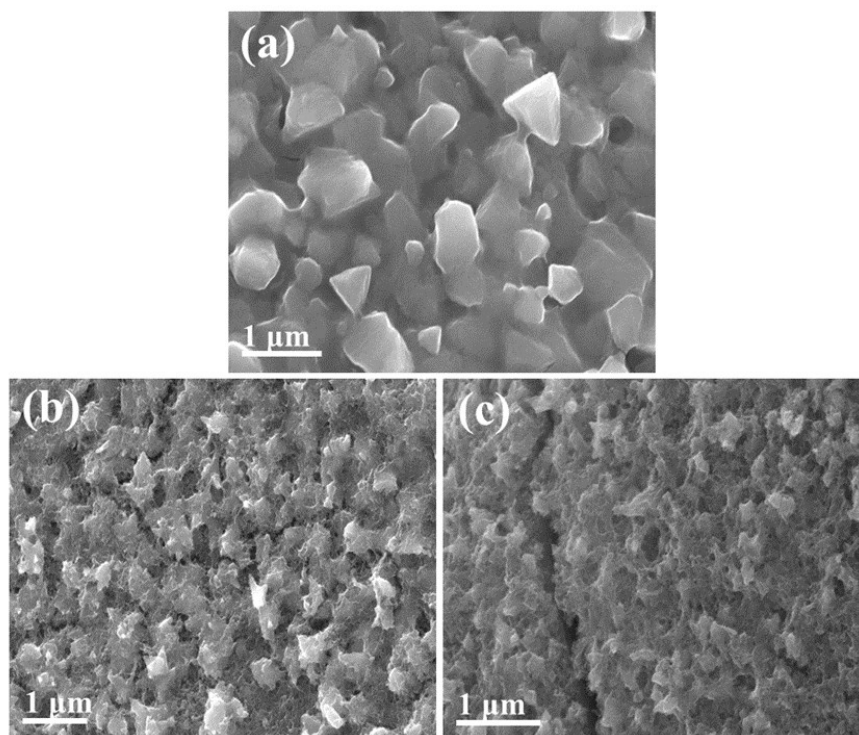

**Figure S5.** SEM images of (a) MoS<sub>2</sub>-Ni<sub>3</sub>S<sub>2</sub> (UR-1)/NF, (b) MoS<sub>2</sub>-Ni<sub>3</sub>S<sub>2</sub> (UR-2)/NF, (c) MoS<sub>2</sub>-Ni<sub>3</sub>S<sub>2</sub> (UR-3)/NF.

**Table S4.** The main parameters for evaluating the electrochemical activity of HER

| Catalysts                                                  | $\eta_{10}$ (mV) | $\eta_{100}$ (mV) | Tafel Slope (mV dec <sup>-1</sup> ) |
|------------------------------------------------------------|------------------|-------------------|-------------------------------------|
| MoS <sub>2</sub> -Ni <sub>3</sub> S <sub>2</sub> (UR-1)/NF | 98               | 181               | 74.8                                |
| MoS <sub>2</sub> -Ni <sub>3</sub> S <sub>2</sub> (UR-2)/NF | 124              | 205               | 81.5                                |
| MoS <sub>2</sub> -Ni <sub>3</sub> S <sub>2</sub> (UR-2)/NF | 132              | 224               | 84.3                                |

**Table S5.** The main parameters for evaluating the electrochemical activity of OER.

| Catalysts                                                  | $\eta_{100}$ (mV) | Tafel Slope (mV dec <sup>-1</sup> ) |
|------------------------------------------------------------|-------------------|-------------------------------------|
| MoS <sub>2</sub> -Ni <sub>3</sub> S <sub>2</sub> (UR-1)/NF | 355               | 97.4                                |
| MoS <sub>2</sub> -Ni <sub>3</sub> S <sub>2</sub> (UR-2)/NF | 388               | 116.3                               |
| MoS <sub>2</sub> -Ni <sub>3</sub> S <sub>2</sub> (UR-3)/NF | 414               | 126.7                               |

**Table S6.** Comparison of overall water splitting performance of MoS<sub>2</sub>-Ni<sub>3</sub>S<sub>2</sub> (UR-2)/NF with that of some recently reported bifunctional electrocatalysts in alkaline media.

| Catalysts                                                             | $\eta_{10}$ (V) | Electrolyte | Ref.      |
|-----------------------------------------------------------------------|-----------------|-------------|-----------|
| MoS <sub>2</sub> -Ni <sub>3</sub> S <sub>2</sub> (UR-2)/NF            | 1.56            | 1.0 M KOH   | This work |
| Co <sub>9</sub> S <sub>8</sub> Ni <sub>3</sub> S <sub>2</sub> HNTs/Ni | 1.59            | 1.0 M KOH   | 10        |
| Co/ $\beta$ -Mo <sub>2</sub> C@N-CNTs                                 | 1.64            | 1.0 M KOH   | 13        |
| O-CoMoS nanosheet                                                     | 1.60            | 1.0 M KOH   | 14        |
| G-Mo-Ni <sub>3</sub> S <sub>2</sub> -2/NF                             | 1.58            | 1.0 M KOH   | 15        |
| Co-MoS <sub>1+x</sub> Se <sub>1+y</sub> 1-5                           | 1.60            | 1.0 M KOH   | 17        |
| CoS <sub>x</sub> /Ni <sub>3</sub> S <sub>2</sub> @NF                  | 1.572           | 1.0 M KOH   | 20        |
| Ni/Mo <sub>2</sub> C(1:2)-NCNFs                                       | 1.64            | 1.0 M KOH   | 21        |
| Ni-S-P                                                                | 1.58            | 1.0 M KOH   | 24        |
| S-CoO/Co <sub>3</sub> O <sub>4</sub>                                  | 1.60            | 1.0 M KOH   | 27        |
| ANF@NW                                                                | 1.71            | 1.0 M KOH   | 30        |
| NiSe <sub>2</sub> /3DSNG/NF                                           | 1.59            | 1.0 M KOH   | 31        |
| CoS <sub>x</sub> /NCS                                                 | 1.83            | 1.0 M KOH   | 32        |
| Cu-NiS <sub>2</sub>                                                   | 1.64            | 1.0 M KOH   | 33        |
| Ar-NiCo <sub>2</sub> O <sub>4</sub>  S                                | 1.63            | 1.0 M KOH   | 34        |
| CoP NFs                                                               | 1.65            | 1.0 M KOH   | 35        |

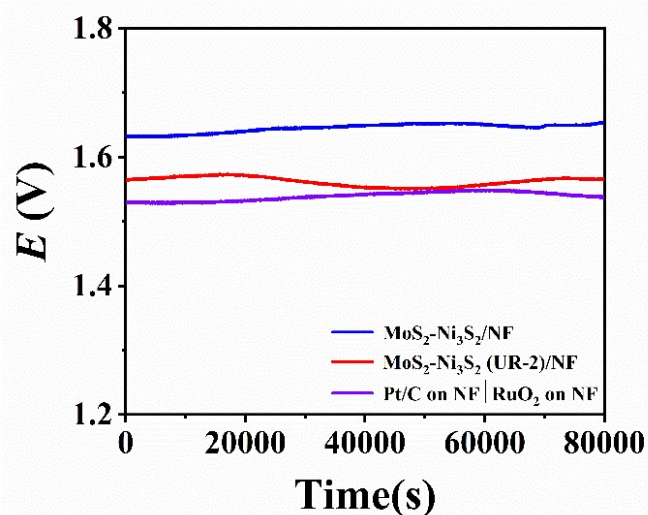

**Figure S6.** Stability tests at  $10 \text{ mA cm}^{-2}$  of  $\text{MoS}_2\text{-Ni}_3\text{S}_2$  (UR-2)/NF, Pt/C on NF| $\text{RuO}_2$  on NF and  $\text{MoS}_2\text{-Ni}_3\text{S}_2$ /NF for overall water splitting in an alkaline media (1.0 M KOH).

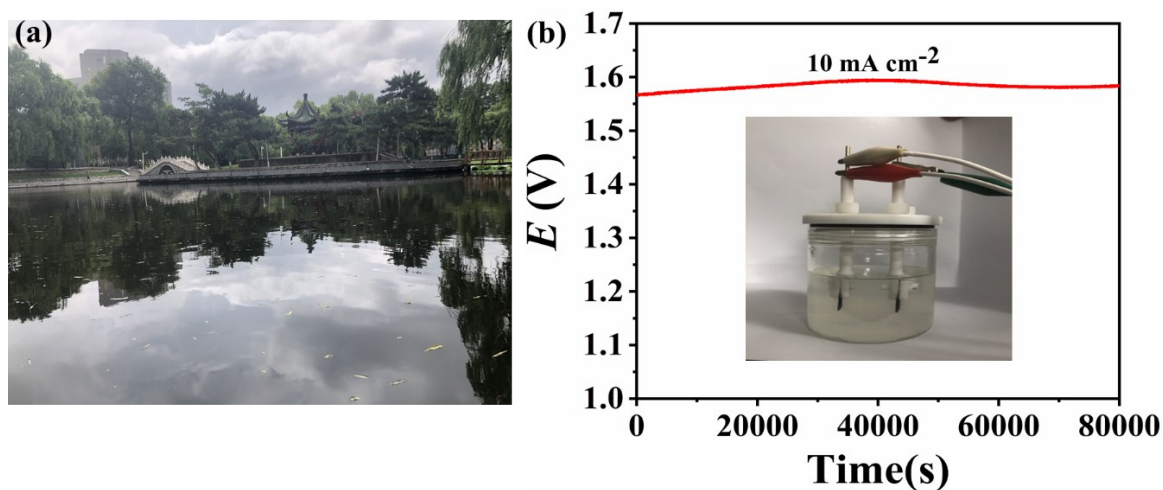

**Figure S7.** (a) Jing Lake (b) endurance tests at  $10 \text{ mA cm}^{-2}$  of  $\text{MoS}_2\text{-Ni}_3\text{S}_2$  (UR-2)/NF for overall water splitting in grey water.

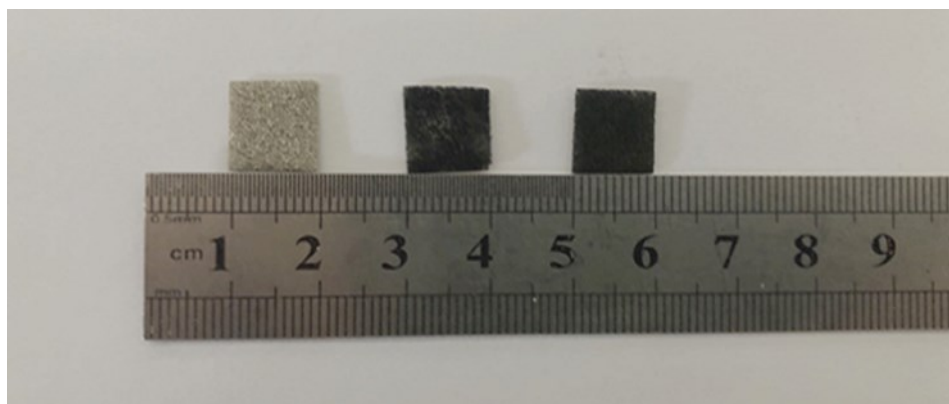

**Figure S8.** Photographs of (a) NF, (b)  $\text{MoS}_2\text{-Ni}_3\text{S}_2$ /NF and (c)  $\text{MoS}_2\text{-Ni}_3\text{S}_2$  (UR-2)/NF.

**Table S7.** The main parameters for test and data analysis of the XRD

| Main parameters       | Parameter settings                                               |
|-----------------------|------------------------------------------------------------------|
| Instrument type       | Siemens D5005 diffractometer                                     |
| Source, photon energy | Cu-K $\alpha$ , $\lambda = 1.5418 \text{ \AA}$ , 40 kV and 30 mA |
| Scanning rate         | $5^\circ \text{ min}^{-1}$                                       |

|                         |                               |
|-------------------------|-------------------------------|
| Geometry                | $\theta$ - $\theta$           |
| Measurement form        | Bragg measurement             |
| Type of detector        | Array detector                |
| Form of the sample      | Self-supporting bulk material |
| Sample testing software | Smartlab guidance             |
| Data analysis software  | Jade6                         |
| Drawing software        | Origin 2018                   |

**Table S8.** The main parameters for test and data analysis of the XPS

|                                      |                               |
|--------------------------------------|-------------------------------|
| Main parameters                      | Parameter settings            |
| Instrument type                      | ESCALAB 250 spectrometer      |
| Source, photon energy                | Al K $\alpha$ , 1486.6 eV     |
| Beam spot size                       | 500 $\mu$ m                   |
| Scan mode                            | CAE                           |
| Whether it is a monochromatic source | monochromatic                 |
| Sample testing software              | Avantage                      |
| Resolution                           | 0.5 eV                        |
| Form of the sample                   | Self-supporting bulk material |
| Data analysis software               | XPS peak 4.1                  |
| Background type of XPS peak 4.1      | Linear                        |
| %Lorentzian-Gaussian of XPS peak 4.1 | 80%                           |



**REFERENCES**

1. J. Li, P. Xu, R. Zhou, R. Li, L. Qiu, S. P. Jiang and D. Yuan, Co<sub>9</sub>S<sub>8</sub>-Ni<sub>3</sub>S<sub>2</sub> heterointerfaced nanotubes on Ni foam as highly efficient and flexible bifunctional electrodes for water splitting, *Electrochim. Acta*, 2019, **299**, 152-162.
2. N. Jiang, Q. Tang, M. Sheng, B. You, D.-e. Jiang and Y. Sun, Nickel sulfides for electrocatalytic hydrogen evolution under alkaline conditions: a case study of crystalline NiS, NiS<sub>2</sub>, and Ni<sub>3</sub>S<sub>2</sub> nanoparticles, *Catal. Sci. Technol.*, 2016, **6**, 1077-1084.
3. Z. Lin, Z. Wang, S. Shen, Y. Chen, Z. Du, W. Tao, A. Xu, X. Ye, W. Zhong and S. Feng, One-step method to achieve multiple decorations on lamellar MoS<sub>2</sub> to synergistically enhance the electrocatalytic HER performance, *J. Alloys Compd.*, 2020, **834**, 155217.
4. S. Song, Y. Wang, W. Li, P. Tian, S. Zhou, H. Gao, X. Tian and J. Zang, Co-doped Ni<sub>3</sub>S<sub>2</sub> hierarchical nanoarrays derived from zeolitic imidazolate frameworks as bifunctional electrocatalysts for highly enhanced overall-water-splitting activity, *J. Alloys Compd.* 2020, **827**, 154299.
5. C. Tang, Z. Pu, Q. Liu, A. M. Asiri, Y. Luo and X. Sun, Ni<sub>3</sub>S<sub>2</sub> nanosheets array supported on Ni foam: A novel efficient three-dimensional hydrogen-evolving electrocatalyst in both neutral and basic solutions, *Int. J. Hydrogen Energy*, 2015, **40**, 4727-4732.
6. J. Zhang, T. Wang, D. Pohl, B. Rellinghaus, R. Dong, S. Liu, X. Zhuang and X. Feng, Interface engineering of MoS<sub>2</sub>/Ni<sub>3</sub>S<sub>2</sub> heterostructures for highly enhanced electrochemical overall-water-splitting activity, *Angew. Chem., Int. Ed.*, 2016, **55**, 6702-6707.
7. H. Liang, L. Li, F. Meng, L. Dang, J. Zhuo, A. Forticaux, Z. Wang and S. Jin, Porous two-dimensional nanosheets converted from layered double hydroxides and their applications in electrocatalytic water splitting, *Chem. Mater.*, 2015, **27**, 5702-5711.
8. Y. Qu, M. Yang, J. Chai, Z. Tang, M. Shao, C. T. Kwok, M. Yang, Z. Wang, D. Chua, S. Wang, Z. Lu and H. Pan, Facile synthesis of vanadium-doped Ni<sub>3</sub>S<sub>2</sub> nanowire arrays as active electrocatalyst for hydrogen evolution reaction, *ACS Appl. Mater. Interfaces*, 2017, **9**, 5959-5967.
9. T. Kou, T. Smart, B. Yao, I. Chen, D. Thota, Y. Ping and Y. Li, Theoretical and experimental insight into the effect of nitrogen doping on hydrogen evolution activity of Ni<sub>3</sub>S<sub>2</sub> in alkaline medium, *Adv. Energy Mater.*, 2018, **8**, 1703538.
10. J. Li, P. K. Shen and Z. Tian, One-step synthesis of Ni<sub>3</sub>S<sub>2</sub> nanowires at low temperature as efficient electrocatalyst for hydrogen evolution reaction, *Int. J.*

*Hydrogen Energy*, 2017, **42**, 7136-7142.

11. K. J. H. Lim, G. Yilmaz, Y.-F. Lim and G. W. Ho, Multi-compositional hierarchical nanostructured  $\text{Ni}_3\text{S}_2@\text{MoS}_x/\text{NiO}$  electrodes for enhanced electrocatalytic hydrogen generation and energy storage, *J. Mater. Chem. A*, 2018, **6**, 20491-20499.
12. X. Zhang, H. Xu, X. Li, Y. Li, T. Yang and Y. Liang, Facile synthesis of nickel-iron/nanocarbon hybrids as advanced electrocatalysts for efficient water splitting, *ACS Catal.*, 2015, **6**, 580-588.
13. T. Ouyang, Y. Q. Ye, C. Y. Wu, K. Xiao and Z. Q. Liu, Heterostructures composed of N-doped carbon nanotubes encapsulating cobalt and beta- $\text{Mo}_2\text{C}$  nanoparticles as bifunctional electrodes for water splitting, *Angew. Chem., Int. Ed.*, 2019, **58**, 4923-4928.
14. J. Hou, B. Zhang, Z. Li, S. Cao, Y. Sun, Y. Wu, Z. Gao and L. Sun, Vertically aligned oxygenated- $\text{CoS}_2$ - $\text{MoS}_2$  heteronanosheet architecture from polyoxometalate for efficient and stable overall water splitting, *ACS Catal.*, 2018, **8**, 4612-4621.
15. J. Li, X. Zhang, Z. Zhang, Z. Li, M. Gao, H. Wei and H. Chu, Graphene-quantum-dots-induced facile growth of porous molybdenum doped  $\text{Ni}_3\text{S}_2$  nanoflakes as efficient bifunctional electrocatalyst for overall water splitting, *Electrochim. Acta*, 2019, **304**, 487-494.
16. H. Yang, Y. Huang, W. Y. Teoh, L. Jiang, W. Chen, L. Zhang and J. Yan, Molybdenum selenide nanosheets surrounding nickel selenides sub-microislands on nickel foam as high-performance bifunctional electrocatalysts for water splitting, *Electrochim. Acta*, 2020, **349**, 136336.
17. Q. Zhou, X. Luo, Z. Liu, S. Li, Y. Nan, H. Deng, Y. Ma and W. Xu, Co-doped 1T'/T phase dominated  $\text{MoS}_{1+x}\text{Se}_{1+y}$  alloy nanosheets as bifunctional electrocatalyst for overall water splitting, *Appl. Surf. Sci.*, 2020, **513**, 145828.
18. X. Wang, Y. Xie, W. Zhou, X. Wang, Z. Cai, Z. Xing, M. Li and K. Pan, The self-supported Zn-doped  $\text{CoNiP}$  microsphere/thorn hierarchical structures as efficient bifunctional catalysts for water splitting, *Electrochim. Acta*, 2020, **339**, 135933.
19. J. Li, G. Wei, Y. Zhu, Y. Xi, X. Pan, Y. Ji, I. V. Zatovsky and W. Han, Hierarchical  $\text{NiCoP}$  nanocone arrays supported on Ni foam as an efficient and stable bifunctional electrocatalyst for overall water splitting, *J. Mater. Chem. A*, 2017, **5**, 14828-14837.
20. S. Shit, S. Chhetri, W. Jang, N. C. Murmu, H. Koo, P. Samanta and T. Kuila, Cobalt sulfide/nickel sulfide heterostructure directly grown on nickel foam: an efficient and durable electrocatalyst for overall water splitting application, *ACS Appl. Mater. Interfaces*, 2018, **10**, 27712-27722.
21. M. Li, Y. Zhu, H. Wang, C. Wang, N. Pinna and X. Lu, Ni strongly coupled with  $\text{Mo}_2\text{C}$  encapsulated in nitrogen-doped carbon nanofibers as robust bifunctional catalyst for overall water splitting, *Adv. Energy Mater.*, 2019, **9**, 1803185.
22. M. B. Zakaria, Y. Guo, J. Na, R. Tahawy, T. Chikyow, W. A. El-Said, D. A. El-Hady, W. Alshitari, Y. Yamauchi and J. Lin, Layer-by-layer motif

- heteroarchitecturing of N,S-Codoped reduced graphene oxide-wrapped Ni/NiS nanoparticles for the electrochemical oxidation of water, *ChemSusChem*, 2020, **13**, 3269-3276.
23. X. He, X. Zhao, F. Yin, B. Chen, G. Li and H. Yin, NiS-FeS/N, S co-doped carbon hybrid: synergistic effect between NiS and FeS facilitating electrochemical oxygen evolution reaction, *Int. J. Energy Res.*, 2020, **44**, 7057-7067.
  24. Q. Xu, W. Gao, M. Wang, G. Yuan, X. Ren, R. Zhao, S. Zhao and Q. Wang, Electrodeposition of NiS/Ni<sub>2</sub>P nanoparticles embedded in amorphous Ni(OH)<sub>2</sub> nanosheets as an efficient and durable dual-functional electrocatalyst for overall water splitting, *Int. J. Hydrogen Energy*, 2020, **45**, 2546-2556.
  25. Y. Yang, Y. Kang, H. Zhao, X. Dai, M. Cui, X. Luan, X. Zhang, F. Nie, Z. Ren and W. Song, An interfacial electron transfer on tetrahedral NiS<sub>2</sub>/NiSe<sub>2</sub> heterocages with dual-phase synergy for efficiently triggering the oxygen evolution reaction, *Small*, 2020, **16**, 1905083.
  26. P. He, Y. Xie, Y. Dou, J. Zhou, A. Zhou, X. Wei and J. R. Li, Partial sulfurization of a 2D MOF array for highly efficient oxygen evolution reaction, *ACS Appl. Mater. Interfaces*, 2019, **11**, 41595-41601.
  27. T. Sun, P. Liu, Y. Zhang, Z. Chen, C. Zhang, X. Guo, C. Ma, Y. Gao and S. Zhang, Boosting the electrochemical water splitting on Co<sub>3</sub>O<sub>4</sub> through surface decoration of epitaxial S-doped CoO layers, *Chem. Eng. J.*, 2020, **390**, 124591.
  28. S. M. N. Jeghan and G. Lee, One-dimensional hierarchical nanostructures of NiCo<sub>2</sub>O<sub>4</sub>, NiCo<sub>2</sub>S<sub>4</sub> and NiCo<sub>2</sub>Se<sub>4</sub> with superior electrocatalytic activities toward efficient oxygen evolution reaction, *Nanotechnology*, 2020, **31**, 295405.
  29. R. A. Raimundo, V. D. Silva, E. S. Medeiros, D. A. Macedo, T. A. Simões, U. U. Gomes, M. A. Morales and R. M. Gomes, Multifunctional solution blow spun NiFe–NiFe<sub>2</sub>O<sub>4</sub> composite nanofibers: structure, magnetic properties and OER activity, *J. Phys. Chem. Solids*, 2020, **139**, 109325.
  30. H. Sun, Z. Ma, Y. Qiu, H. Liu and G. G. Gao, Ni@NiO nanowires on nickel foam prepared via "acid hungry" strategy: high supercapacitor performance and robust electrocatalysts for water splitting reaction, *Small*, 2018, **14**, 1800294.
  31. J. Zhou, Z. Wang, D. Yang, F. Qi, X. Hao, W. Zhang and Y. Chen, NiSe<sub>2</sub>-anchored N, S-doped graphene/Ni foam as a free-standing bifunctional electrocatalyst for efficient water splitting, *Nanoscale*, 2020, **12**, 9866-9872.
  32. Q. Ju, R. Ma, Y. Pei, B. Guo, Q. Liu, T. Zhang, M. Yang and J. Wang, Nitrogen-doped carbon spheres decorated with CoS<sub>x</sub> nanoparticles as multifunctional electrocatalysts for rechargeable zn-air battery and overall water splitting, *Mater. Res. Bull.*, 2020, **125**, 110770.
  33. K. N. Dinh, Y. Sun, Z. Pei, Z. Yuan, A. Suwardi, Q. Huang, X. Liao, Z. Wang, Y. Chen and Q. Yan, Electronic modulation of nickel disulfide toward efficient water electrolysis, *Small*, 2020, **16**, 1905885.
  34. J. H. Lin, Y. T. Yan, T. X. Xu, C. Q. Qu, J. Li, J. Cao, J. C. Feng and J. L. Qi, S doped NiCo<sub>2</sub>O<sub>4</sub> nanosheet arrays by Ar plasma: an efficient and bifunctional electrode for overall water splitting, *J. Colloid Interface Sci.*, 2020, **560**, 34-39.

35. L. Ji, J. Wang, X. Teng, T. J. Meyer and Z. Chen, CoP nanoframes as bifunctional electrocatalysts for efficient overall water splitting, *ACS Catal.*, 2019, **10**, 412-419.
